# Supplementary material for: A Survey of Iranian Primiparous Women’s Perceptions of Vaginal Examination During Labor
Source: PubMed Central journal article supplement — J Prim Care Community Health. 2020 Jul 8;11:2150132720940517. doi: 10.1177/2150132720940517 (PMC7359644; doi:10.1177/2150132720940517), 2020-07-08
Supplement: JPC940517_Supplementary_Material_CLN.pdf [file JPC940517_Supplementary_Material_CLN.pdf]

### Supplementary Table 1.

Women's perception of how well their VEs were managed.

| ITEM | Statement                                                     | Strongly disagree |   | Disagree |      | No strong view |     | Agree |      | Strongly agree |     | Mean | SD   |
|------|---------------------------------------------------------------|-------------------|---|----------|------|----------------|-----|-------|------|----------------|-----|------|------|
|      |                                                               | N                 | % | N        | %    | N              | %   | N     | %    | N              | %   |      |      |
| 1    | The staff gave me excellent information about VEs             | 0                 | 0 | 48       | 24   | 3              | 1.5 | 149   | 74.5 | 0              | 0   | 3.50 | 0.85 |
| 2    | I felt I could always refuse a VE <sup>L</sup>                | 2                 | 1 | 152      | 76   | 6              | 3   | 40    | 20   | 0              | 0   | 2.42 | 0.81 |
| 3    | The staff always asked my permission before performing a VE   | 0                 | 0 | 81       | 40.5 | 8              | 4   | 111   | 55.5 | 0              | 0   | 3.15 | 0.97 |
| 4    | VEs were always performed with great Sensitivity <sup>H</sup> | 0                 | 0 | 4        | 2    | 13             | 6.5 | 180   | 90   | 3              | 1.5 | 3.91 | 0.39 |
| 5    | The subject of VEs was never properly discussed <sup>*L</sup> | 0                 | 0 | 33       | 16.5 | 13             | 6.5 | 153   | 76.5 | 1              | 0.5 | 2.39 | 0.76 |
| 6    | VEs were done with dignity <sup>H</sup>                       | 0                 | 0 | 16       | 8    | 10             | 5   | 172   | 86   | 2              | 1   | 3.80 | 0.58 |

|    |                                                                         |   |   |     |      |    |     |     |      |   |     |      |      |
|----|-------------------------------------------------------------------------|---|---|-----|------|----|-----|-----|------|---|-----|------|------|
| 7  | I felt that I always gave my consent before a VE was carried out        | 0 | 0 | 30  | 15   | 9  | 4.5 | 160 | 80   | 1 | 0.5 | 3.66 | 0.73 |
| 8  | I always felt well supported during the VE <sup>H</sup>                 | 0 | 0 | 16  | 8    | 16 | 8   | 167 | 83.5 | 1 | 0.5 | 3.76 | 0.59 |
| 9  | Privacy was always maintained during VE <sup>H</sup>                    | 0 | 0 | 11  | 5.5  | 13 | 6.5 | 175 | 87.5 | 1 | 0.5 | 3.83 | 0.51 |
| 10 | VEs caused me great embarrassment*                                      | 0 | 0 | 73  | 36.5 | 9  | 4.5 | 113 | 56.5 | 5 | 2.5 | 2.75 | 0.98 |
| 11 | During each VE, I was always told what was happening                    | 0 | 0 | 55  | 27.5 | 13 | 6.5 | 130 | 65   | 2 | 1   | 3.39 | 0.90 |
| 12 | I did not find VE distressing <sup>L</sup>                              | 4 | 2 | 171 | 85.5 | 3  | 1.5 | 22  | 11   | 0 | 0   | 2.21 | 0.65 |
| 13 | Thinking back over my labor, I was given too many vaginal examinations* | 0 | 0 | 55  | 27.5 | 6  | 3   | 132 | 66   | 7 | 3.5 | 2.54 | 0.93 |

|    |                                                                 |   |     |    |     |   |     |    |     |   |     |      |     |
|----|-----------------------------------------------------------------|---|-----|----|-----|---|-----|----|-----|---|-----|------|-----|
| 14 | Coping with VEs caused me great anxiety*.                       | 1 | 0.5 | 56 | 28  | 5 | 2.5 | 13 | 66  | 6 | 3   | 2.57 | 0.9 |
|    |                                                                 |   |     |    |     |   |     | 2  |     |   |     |      | 4   |
| 15 | VEs were far more unpleasant than I ever imagined* <sup>L</sup> | 1 | 0.5 | 47 | 23. | 1 | 5.5 | 13 | 69. | 2 | 1   | 2.53 | 0.8 |
|    |                                                                 |   |     |    | 5   | 1 |     | 9  | 5   |   |     |      | 7   |
| 16 | I found VE painful* <sup>L</sup>                                | 0 | 0   | 31 | 15. | 7 | 3.5 | 15 | 79  | 4 | 2   | 2.32 | 0.7 |
|    |                                                                 |   |     |    | 5   |   |     | 8  |     |   |     |      | 5   |
| 17 | I wish the staff had explained more about VEs*                  | 1 | 0.5 | 12 | 62  | 3 | 16  | 43 | 21. | 0 | 0   | 3.41 | 0.8 |
|    |                                                                 |   |     | 4  |     | 2 |     |    | 5   |   |     |      | 2   |
| 18 | The information gained from VE was reassuring                   | 1 | 0.5 | 43 | 21. | 1 | 7   | 14 | 70  | 2 | 1   | 3.49 | 0.8 |
|    |                                                                 |   |     |    | 5   | 4 |     | 0  |     |   |     |      | 5   |
| 19 | The information gained from VE caused me anxiety*               | 2 | 1   | 12 | 63. | 2 | 12  | 46 | 23  | 1 | 0.5 | 3.41 | 0.8 |
|    |                                                                 |   |     | 7  | 5   | 4 |     |    |     |   |     |      | 6   |
| 20 | I felt the VE was roughly handled at time <sup>H*</sup>         | 2 | 1   | 16 | 83. | 2 | 10. | 10 | 5   | 0 | 0   | 3.80 | 0.5 |
|    |                                                                 |   |     | 7  | 5   | 1 | 5   |    |     |   |     |      | 2   |

\* Negatively worded statements.

<sup>H</sup> Highest means score.

<sup>L</sup> Lowest means score.
